# Supplementary material
Source: publisher site journal article supplement (https://www.spandidos-publications.com/7178/downloadSupplementary)

Figure S1. Forest plot of the high-quality study subgroup analysis. OR, odds ratio; CI, confidence interval.

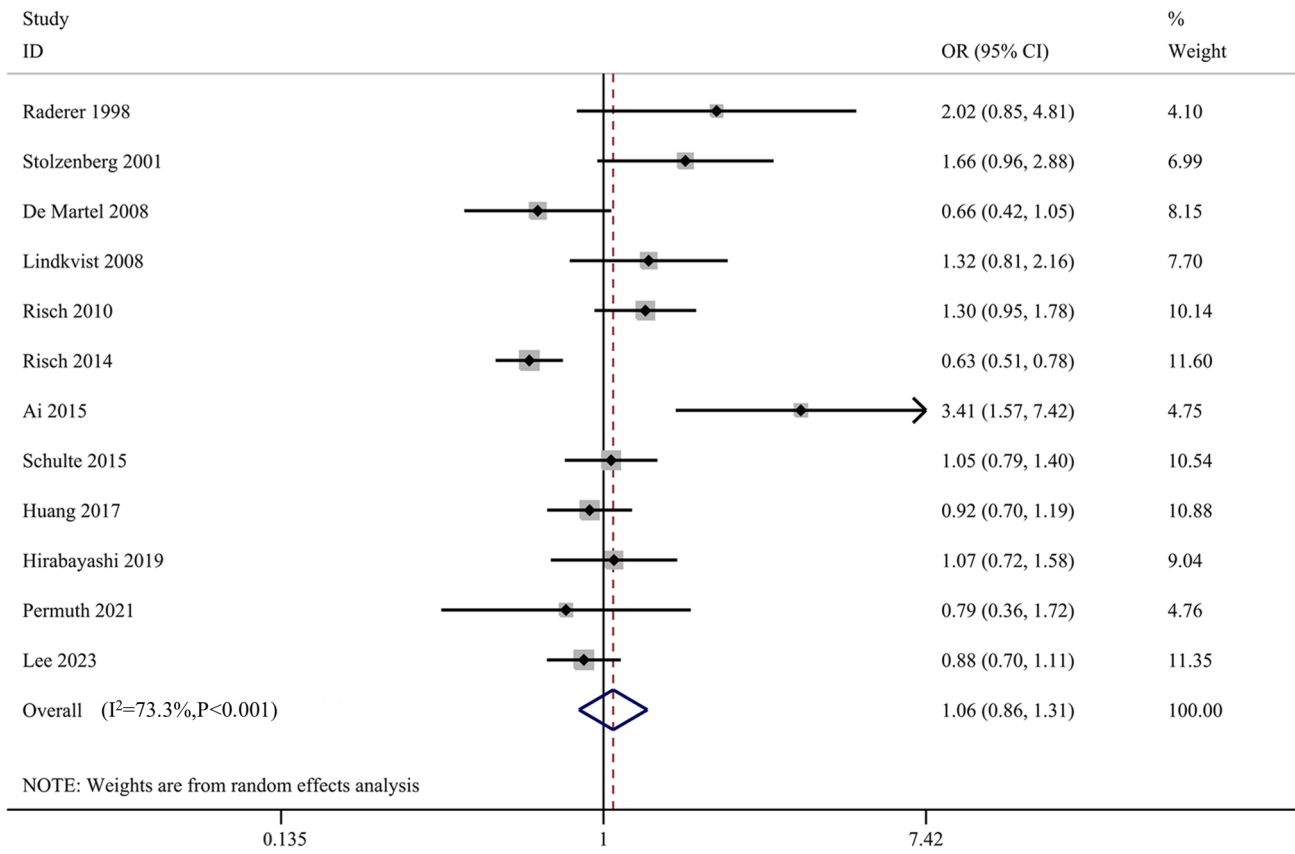

Figure S2. Forest plot of the study region subgroup analysis. OR, odds ratio; CI, confidence interval.

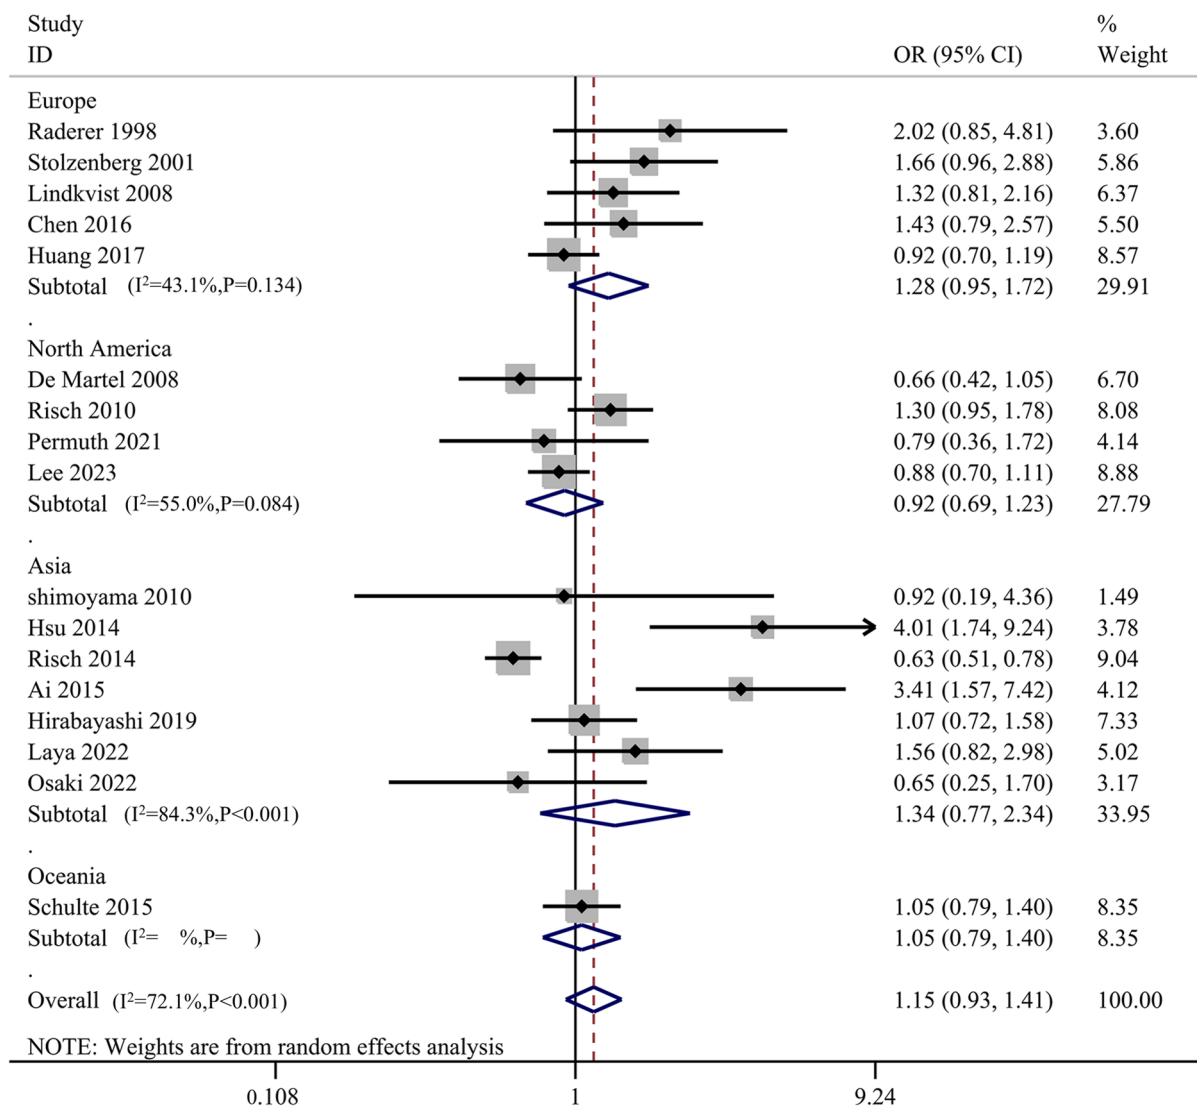

Figure S3. Forest plot of the study design subgroup analysis. OR, odds ratio; CI, confidence interval.

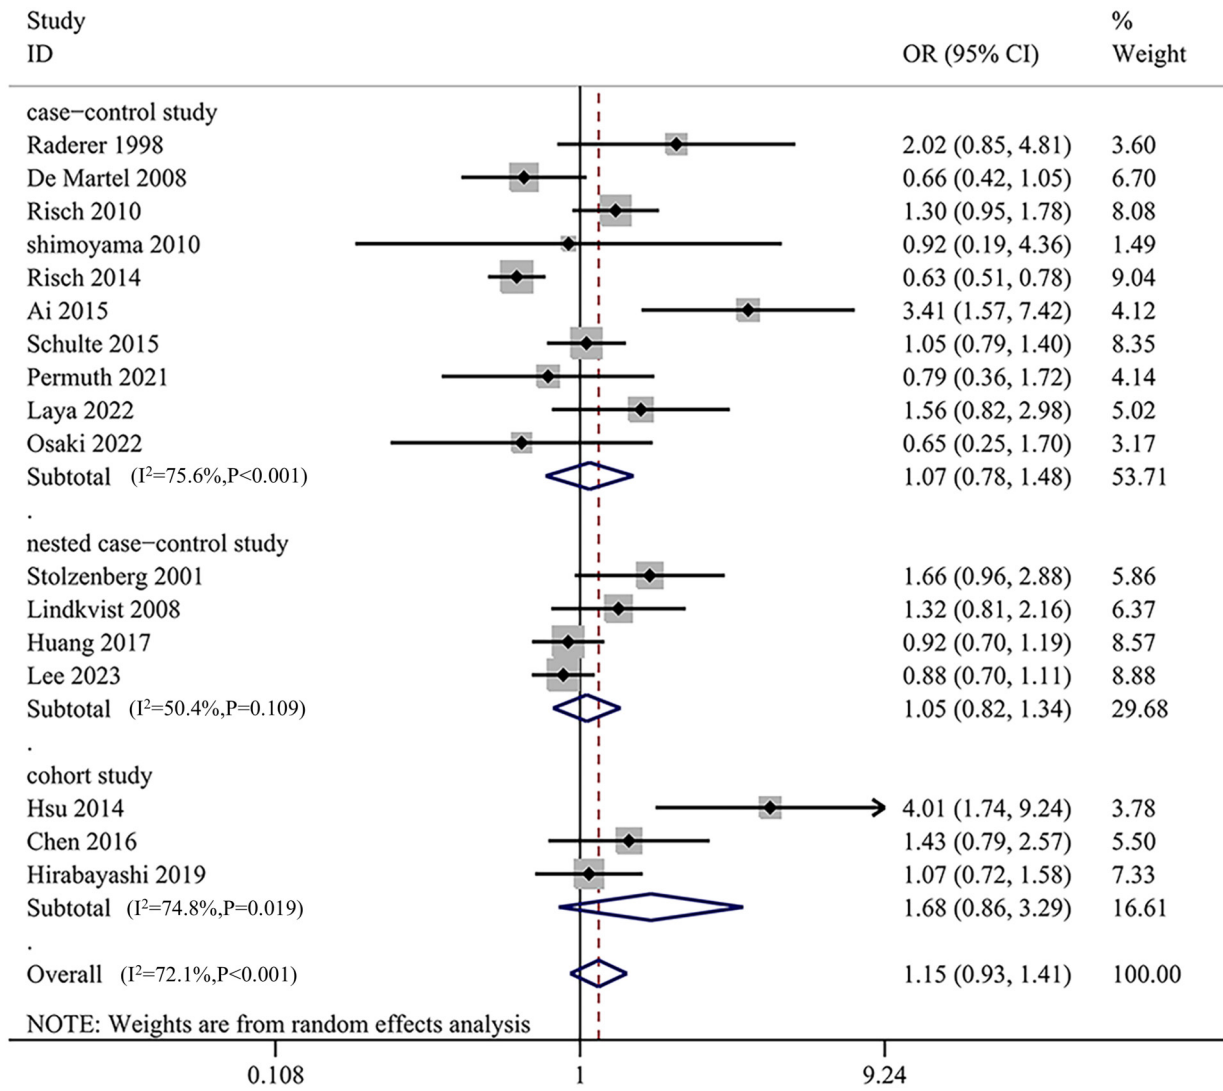

Figure S4. Forest plot of the diagnostic criteria subgroup analysis. OR, odds ratio; CI, confidence interval.

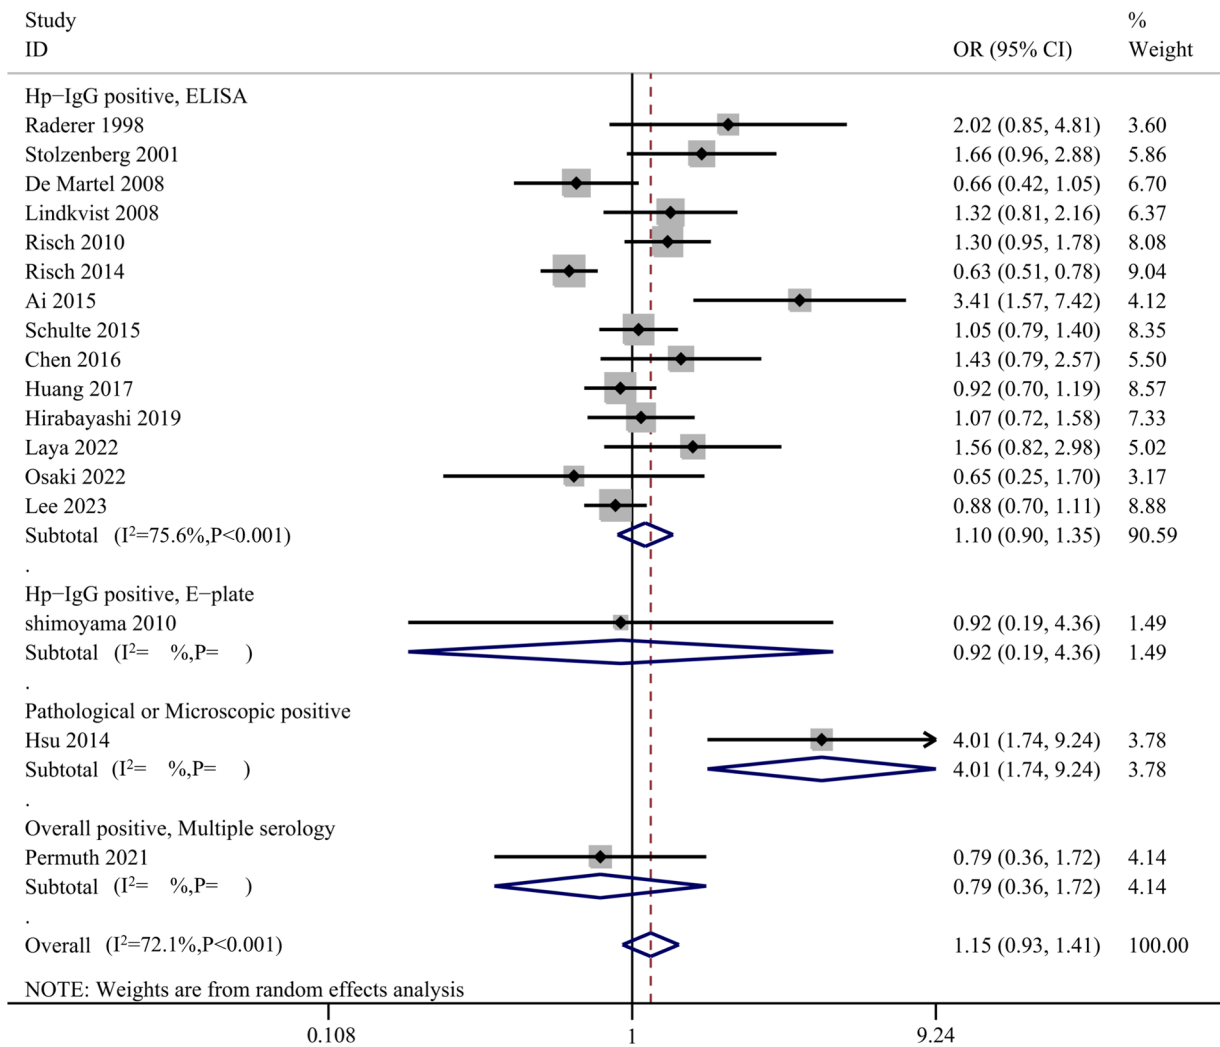

Figure S5. Forest plot for the subgroup analysis of CagA+ *Helicobacter pylori* infection. OR, odds ratio; CI, confidence interval.

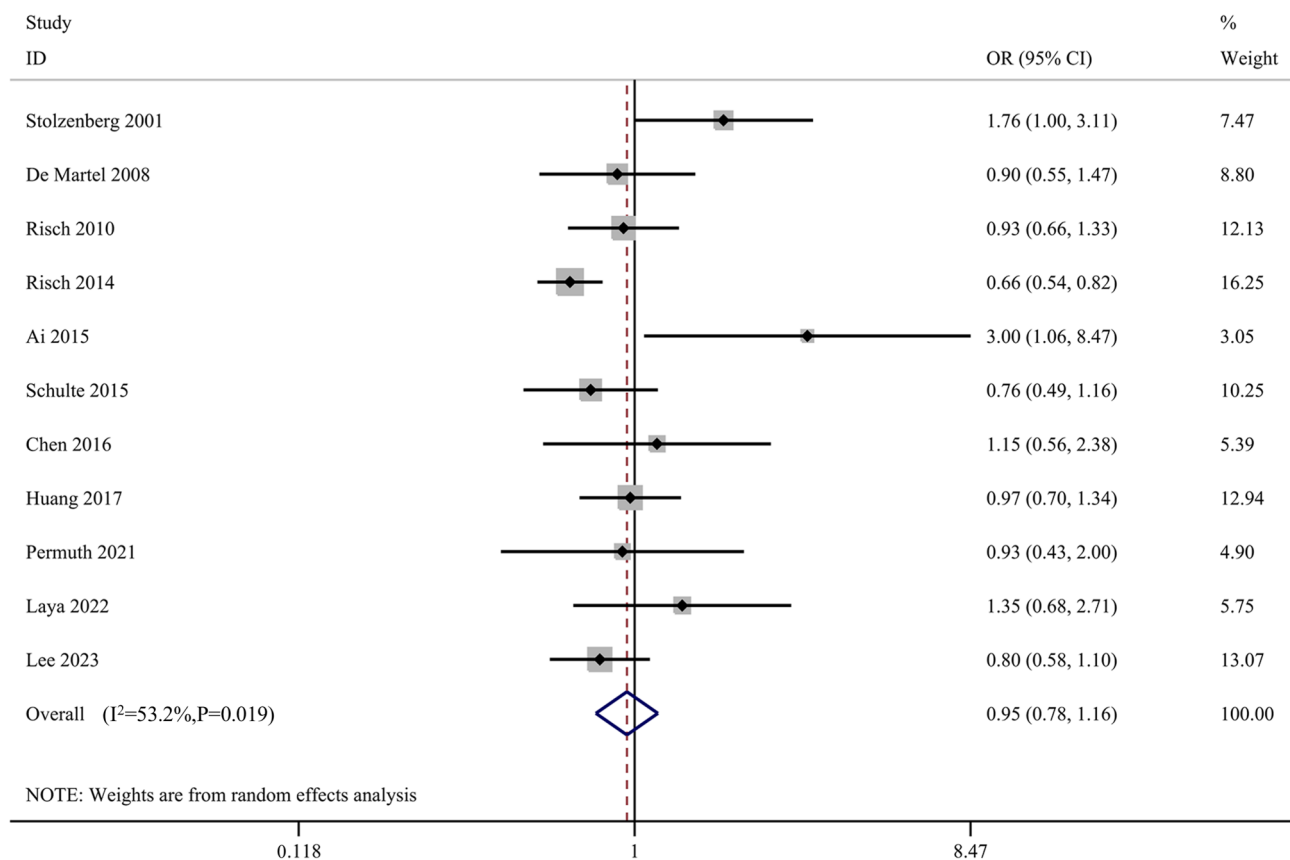

Figure S6. Sensitivity analysis of the meta-analysis of the association between CagA+ *Helicobacter pylori* infection and pancreatic cancer risk. CI, confidence interval.

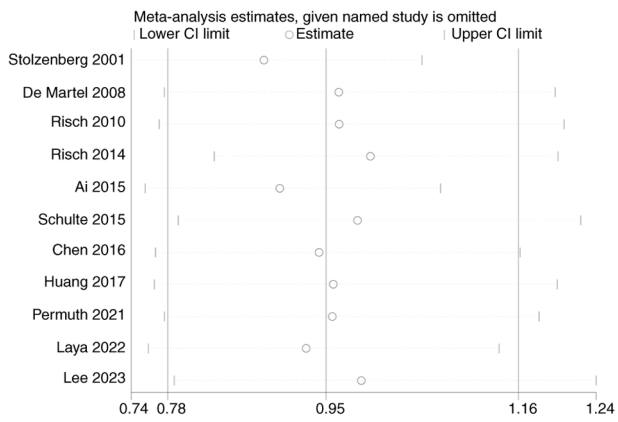

Figure S7. Sensitivity analysis of the meta-analysis of the association between CagA<sup>-</sup> *Helicobacter pylori* infection and pancreatic cancer risk. CI, confidence interval.

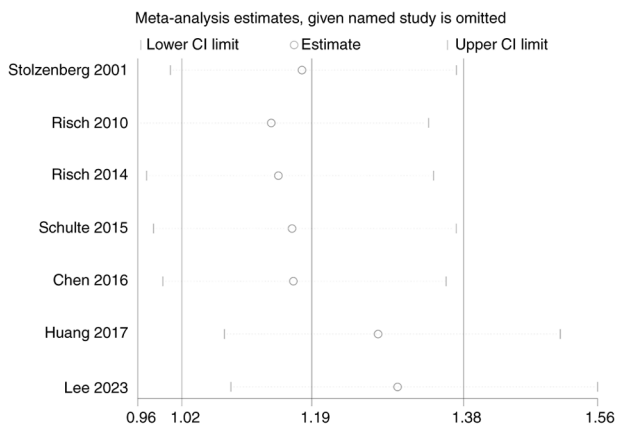

Figure S8. Funnel plot of the overall meta-analysis of the association between *Helicobacter pylori* infection and pancreatic cancer risk. s.e., standard error; OR, odds ratio.

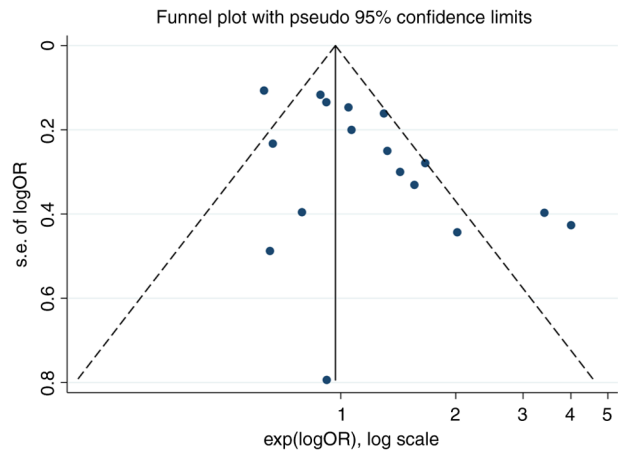

Supplement: Supplementary file 1 [file downloadSupplementary]
